# Supplementary material for: Paraventricular, subparaventricular and periventricular hypothalamic IRS4-expressing neurons are required for normal energy balance
Source: PubMed Central journal article supplement (PMC7099088; doi:10.1038/s41598-020-62468-z), 2020-03-26
Supplement: 41598_2020_62468_MOESM1_ESM.pdf [file 41598_2020_62468_MOESM1_ESM.pdf]

**Supplementary Information** for

“Paraventricular, subparaventricular and periventricular hypothalamic IRS4-expressing neurons are required for normal energy balance”

Amy K. Sutton\*, Ian E. Gonzalez\*, Marianna Sadagurski, Michael Rajala, Chunxia Lu, Margaret B. Allison, Adams JM, Martin G. Myers, Morris F. White, David P. Olson

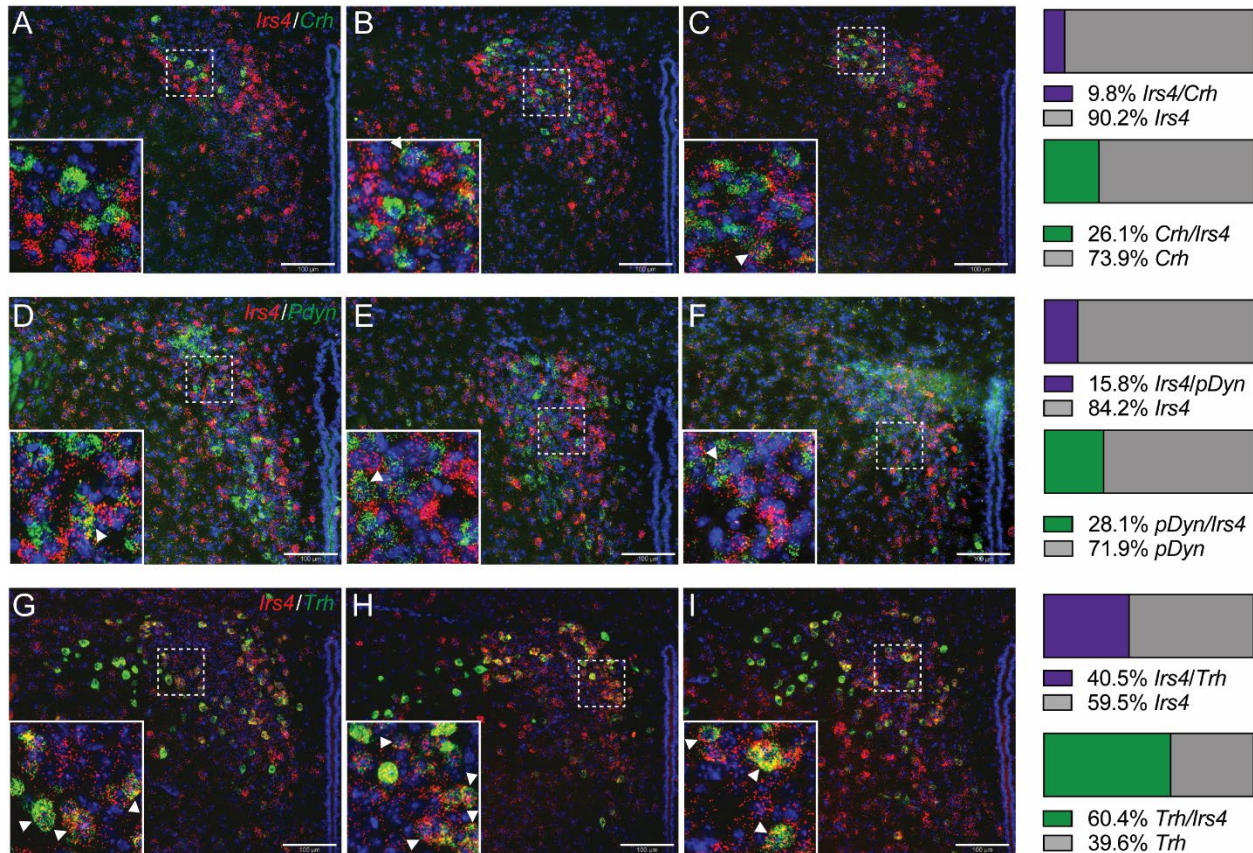

### Supplementary Figure 1.1: Overlap of IRS4 with CRH, pDYN, and TRH in the PVH.

Fluorescent *in situ* hybridization images demonstrate *Irs4* expression (red) overlaid with *Crh* (A-C, green), *Pdyn* (D-E, green), or *Trh* (G-I, green) and DAPI throughout. Co-expression of *Irs4* (purple) with *Crh* (A-C, right), *Pdyn* (D-F, right), or *Trh* (G-I, right), whereas the mean percentage of cells expressing *Crh*, *Pdyn*, or *Trh* that were *Irs4*<sup>+</sup> are represented in green (n=3). Dashed boxes represent insets that were digitally enlarged in bottom left of images. White arrowheads point to colocalized cells within insets. Scale bars represent 100  $\mu$ m.

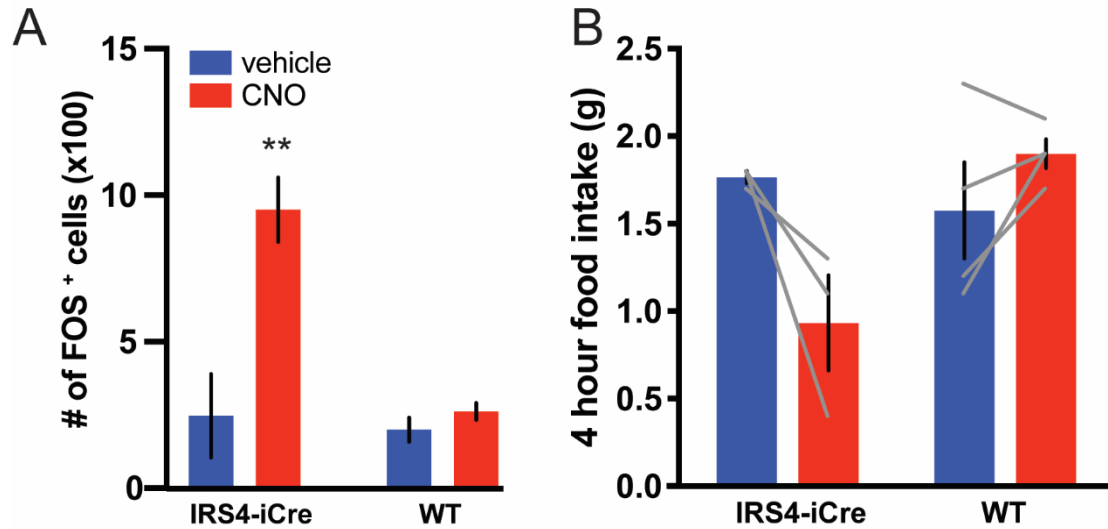

**Supplementary Figure 2.1: Activation of IRS4<sup>PVH</sup> neurons requires hM3Dq expression and CNO administration.** Quantification of unilateral FOS induction demonstrates increased FOS in CNO-injected *IRS4-iCre* mice with Flex-hM3Dq expression compared to those injected with vehicle ( $p=0.006$ ), whereas WT controls had no significant change in nuclear FOS with CNO administration. (A). Differences in four-hour (B) feeding is not observed between WT mice injected with vehicle or CNO at the onset of the dark cycle ( $p=0.2255$ ,  $t=1.522$ ), whereas a trend exists for decreased food intake in *IRS4-iCre* mice with Flex-hM3Dq expression in the PVH ( $p=0.1066$ ,  $t=2.813$ ). Average values  $\pm$  SEM are shown for food intake values, average values  $\pm$  SD are shown for FOS quantification. Significance was determined using a paired-t-test in comparison to vehicle values for food intake (WT  $n=4$ , *IRS4-iCre*  $n=3$ ), and a one-way ANOVA followed by Tukey's post-hoc for FOS quantification ( $n=2$ /group).

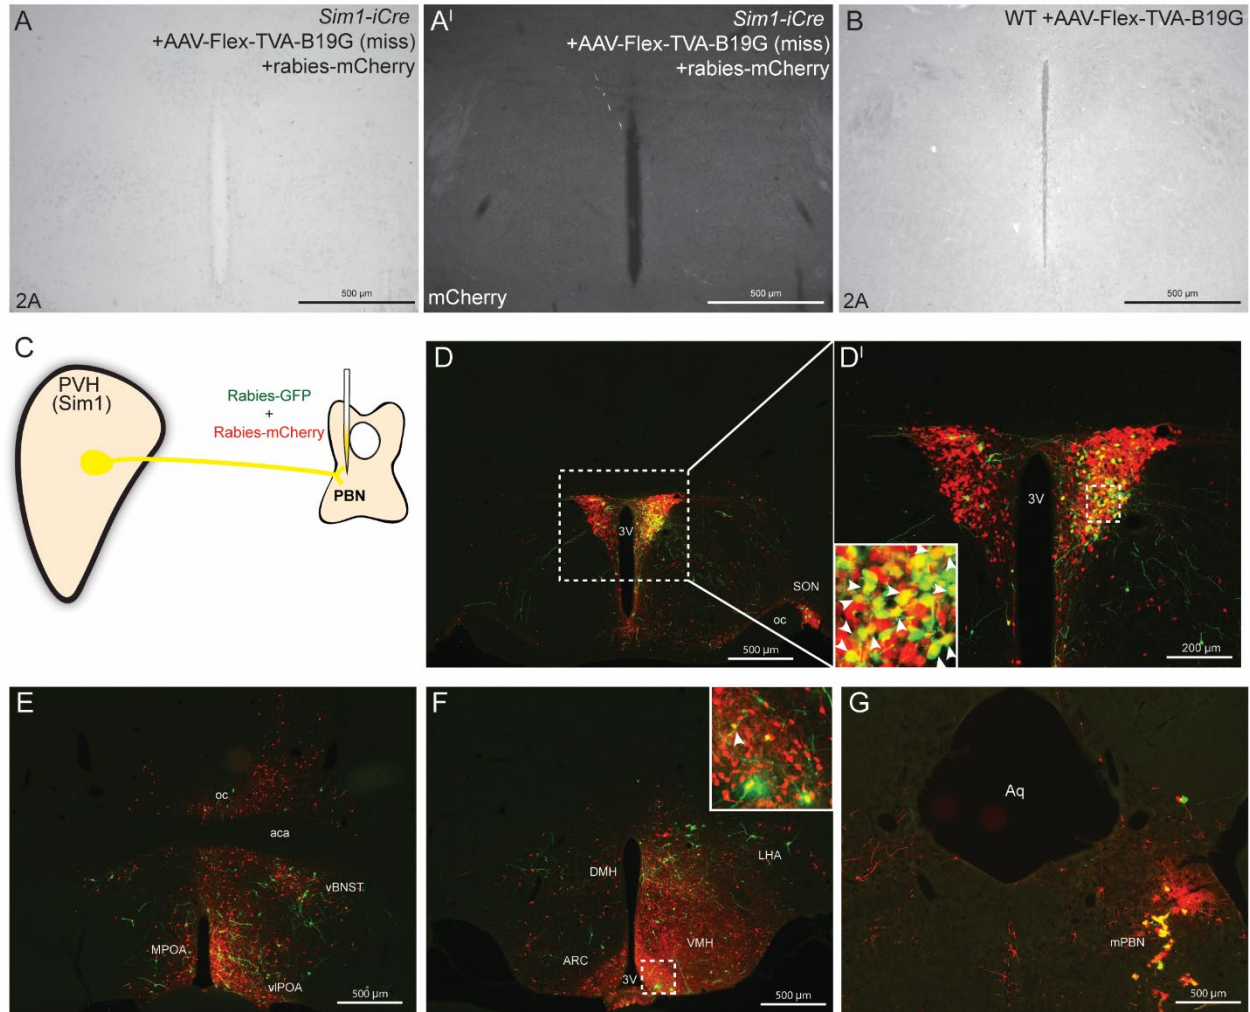

**Supplementary Figure 4.1: Monosynaptic rabies virus tracing is Cre-dependent, dependent on helper virus expression, and capable of dual rabies infection.** IHC in the PVH of *Sim1-Cre +AAV-Flex-TVA-B19G* mice validates a “miss” since 2A staining (reflective of AAV-Flex-TVA-B19G expression) is not detected (A). Still, NTS-directed rabies-mCherry injection in the same mouse displays limited mCherry expression in the PVH, therefore confirming the requirement of AAV-Flex-TVA-B19G expression for modified rabies virus expression (A'). B) 2A expression in wildtype mice injected with AAV-Flex-TVA-B19G demonstrates that Cre recombinase is required for helper virus expression. C) Injection of both rabies-mCherry and rabies-GFP in the same PBN projection target in *Sim1-Cre +AAV-Flex-TVA-B19G* mice illustrates that both rabies viruses can be expressed in PBN-projecting PVH neurons (D). Sites upstream including the bed nucleus of the stria terminalis (BNST, E), preoptic area (POA), arcuate nucleus (ARC, F) and VMH (F) show limited co-labeling. G) Gliosis in the PBN due to rabies-mCherry/rabies-GFP injection demonstrates that both rabies-GFP and rabies-mCherry were mixed and injected at the same site. Dashed boxes indicate regions that are digitally enlarged and shown as insets. White arrowheads indicate co-localization in neurons with both rabies-GFP and rabies-mCherry. 3V=third ventricle, aca=anterior part of anterior commissure, DMH=dorsomedial hypothalamus, oc=optic chiasm, LHA=lateral hypothalamic area.

|                                      | PVH <sup>TetTox</sup> | Unil. PVH <sup>TetTox</sup> | PVH <sup>Flex</sup> | WT <sup>TetTox</sup> |
|--------------------------------------|-----------------------|-----------------------------|---------------------|----------------------|
| BW (g, t=0)                          | 27.17 ±2.02           | 24.78 ±0.60                 | 25.97 ±0.69         | 23.78 ±1.01          |
| BW (g, t=8wk)                        | 36.80 ±4.02***†       | 31.64 ±1.73                 | 30.58 ±0.72         | 26.54 ±0.71          |
| Change in BW (g, t=8wk)              | 10.50 ±1.92***††      | 7.14 ±1.46                  | 4.71 ±0.66          | 2.96 ±0.75           |
| Early weekly food intake (g)         | 39.27 ±3.78*          | 36.42 ±2.36                 | 35.90 ±1.24         | 30.03 ±1.46          |
| Late weekly food intake (g)          | 33.55 ±1.35           | 30.30 ±4.11                 | 32.30 ±2.36         | 27.81 ±1.67          |
| VO <sub>2</sub> (ml/kg LBM)          | 4540 ±167.0           | 4294 ±194.0                 | 4255 ±170.2         | 4477 ±191.8          |
| Average total X activity (counts/hr) | 1106 ±44.98           | 1392 ±37.84                 | 1011 ±49.13         | 1194 ±140.3          |
| body fat (% , early)                 | 19.21 ±1.24***††      | 12.89 ±0.98 <sup>§</sup>    | 12.90 ±1.09         | 13.05 ±0.89          |
| body fat (% , late)                  | 21.86 ±1.85***†       | 12.66 ±1.83 <sup>§§</sup>   | 15.17 ±1.08         | 13.38 ±0.861         |

**Supp. Table 5.1. Unilateral IRS4<sup>PVH</sup> silencing alters bodyweight physiology.** Comparison of bodyweight and CLAMS results from IRS4<sup>PVH</sup> TetTox cohorts with viral injections that only targeted one side of the PVH (Unil. PVH<sup>TetTox</sup>) still demonstrate trends toward changes in physiology. Data represented includes results illustrated in Fig. 5. Data was analyzed using a one-way ANOVA followed by Tukey's multiple comparisons if appropriate, or an unpaired t-test (number of cells infected with AAV-Flex-TetTox between PVH<sup>TetTox</sup> and Unil. PVH<sup>TetTox</sup> cohorts). Average values ± SEM are shown. \*p<0.05, \*\*\*p<0.001 for PVH<sup>TetTox</sup> compared to WT<sup>TetTox</sup>; †p<0.05 for PVH<sup>TetTox</sup> compared to PVH<sup>Flex</sup>; §p<0.05 for PVH<sup>TetTox</sup> compared to Unil. PVH<sup>TetTox</sup>; &p<0.05 for PVH<sup>Flex</sup> compared to WT<sup>TetTox</sup>; §p<0.05 for Unil. PVH<sup>TetTox</sup> compared to WT<sup>TetTox</sup>. PVH<sup>TetTox</sup> n=6 (BW, t=0; early food intake, CLAMS, early body composition), n=5 (BW, t=8wk, change in BW, late body composition), n=4 (late food intake); Unil. PVH<sup>TetTox</sup> n=6 (BW t=0wk, early food intake), n=5 (BW t=8wk, change in BW, late food intake), n=4 (CLAMS, body composition); WT<sup>TetTox</sup> n=13 (BW t=0wk, early food intake, CLAMS), n=11 (BW t=8wk, change in BW, body composition), n=9 (late food intake); PVH<sup>Flex</sup> n=17 (BW t=0, early food intake, late body composition), n=16 (BW t=8wk, change in BW), n=8 (late food intake, CLAMS), n=10 (early body composition).
